# Supplementary material for: Effect of ethylenediamine on the formation of macro, micro, and nanostructures based on [WVI(Cat)2O2]2−
Source: Royal Society of Chemistry journal article supplement (doi:10.1039/c5ce00220f), 2015-01-01
Supplement: c5ce00220f1.pdf [file c5ce00220f1.pdf]

# Effects of ethylenediamine in the formation of macro-, micro, and nanostructures based on $[W^{VI}(\text{Cat})_2\text{O}_2]^{2-}$

Ganghuo Pan<sup>a</sup> Xiaoming Lu<sup>\* ab</sup> Kai Li<sup>a</sup> Minghai Shen<sup>a</sup> Jing Zhao<sup>a</sup>

Department of Chemistry, Capital Normal University, China, Beijing 100048

<sup>b</sup> State Key Laboratory of Structural Chemistry, Fujian Institute of Research on the Structure of Matter, Chinese Academy of Sciences, Fuzhou, Fujian 350002, China.

E-mail: lu-xiaoming@126.com

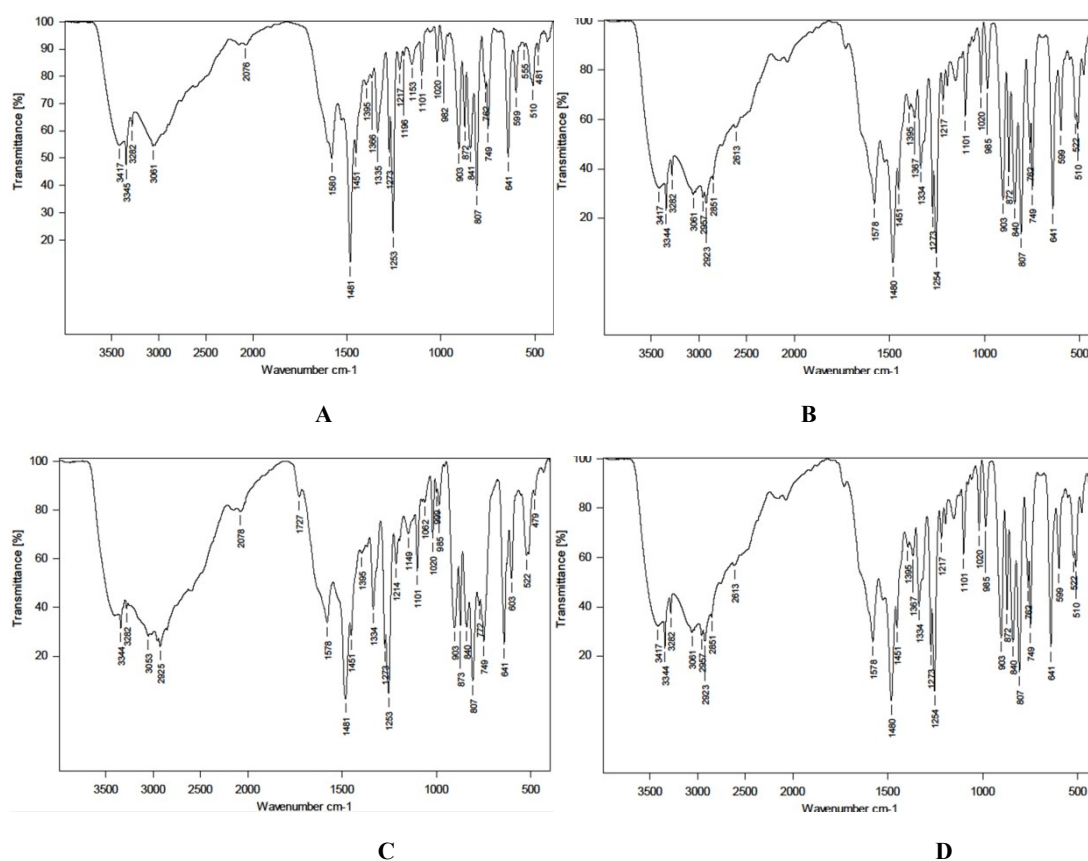

**Figure S1.** IR spectra of crystal 1 (A) and its nanostructure (C), and crystal 2 (B) and its nanostructure (D).

Using a Bruker EQUINOX55 spectrometer, KBr disks of compounds 1 and 2 were scanned to obtain the infrared spectra, from which the bonding patterns of compounds 1 and 2 can be implied. IR spectra of compounds 1 and 2 are summarized in Table S1. We can see that the data are all in the reasonable range, which is consistent with the results of X-ray diffraction. The IR spectra of the nanostructures are almost the same as the IR spectra of the bulk crystals.

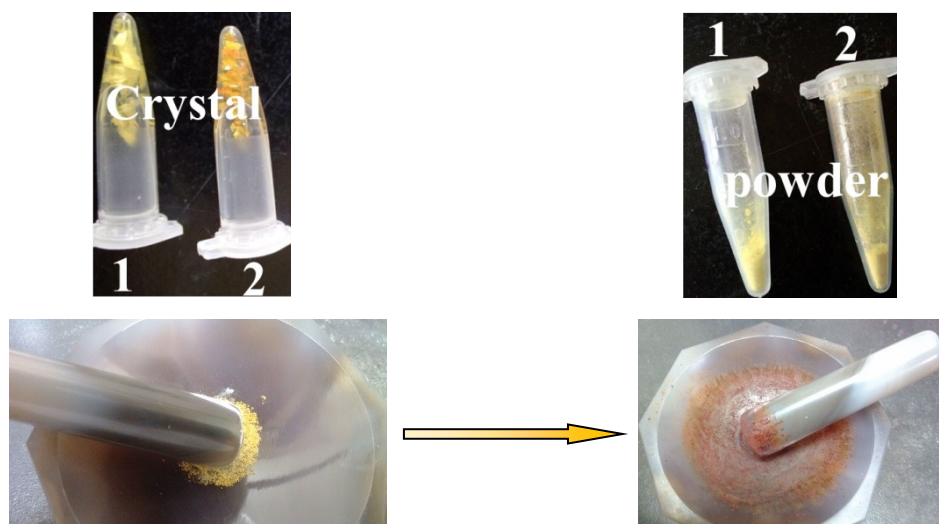

**Figure S2.** Through continuous grinding, the golden yellow powder of crystals change into dark yellow, which means the powder has been disassembled into nano-scale.

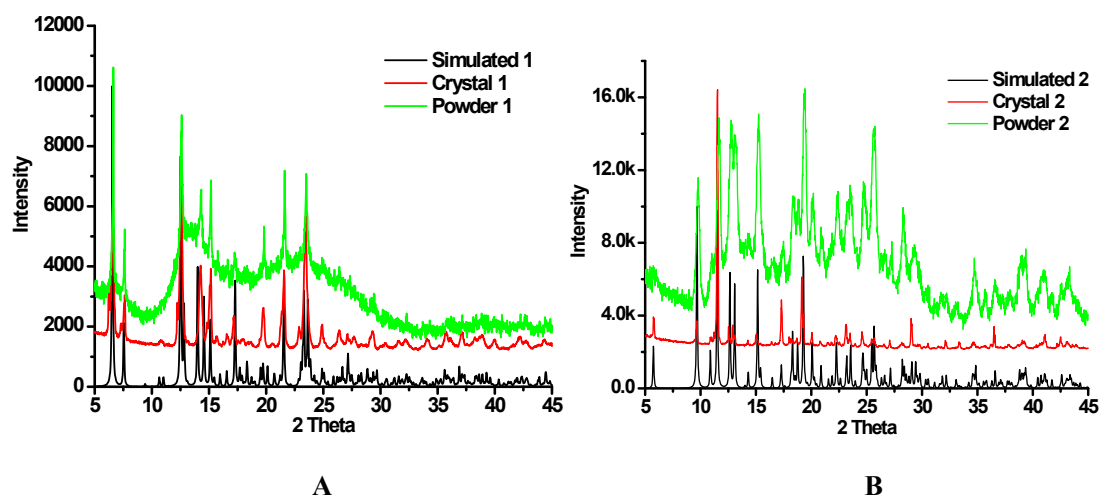

**Figure S3.** (A) Experimental and simulated powder X-ray diffraction patterns for the complex 1. The black line represents the simulated curves by Mercury from the CIF file (Supporting Information) of the single crystal structure, the red line represents the curve of the crystal, and the green line represents the curve of the nanostructure. (B) Experimental and simulated powder X-ray diffraction patterns for the complex 2. The black line represents the simulated curves by Mercury from the CIF (Supporting Information) file of the single crystal structure, the red line represents the curve of the crystal, and the green line represents the curve of the nanostructure.

### UV-vis spectra of the complexes

Figure S4 (A) is the UV-vis spectra of the complex 1 and complex 2, quite similar electronic feature from which can be seen. Complex1 exhibited peak at 280 nm can be assigned to the transfer of the electrons of the coordinated catechol ligand from  $n-\pi$  to  $n-\pi^*$ , and the signal at 328

nm associated with the transition of the electrons between the d orbital to the catechol ligand. The spectra of the complex2 presented peaks at 286 nm, and 322 nm.

Figure S4 (B) is the CV curve of the complex 1 and complex 2, quite similar electrochemical properties of the complexes can be seen from it. Complex1 exhibited oxidize electronic potential peak at +0.414V and deoxidation electronic potential peak at +0.086V and the peak of the complex2 presented at +0.382V, and +0.100 nm.

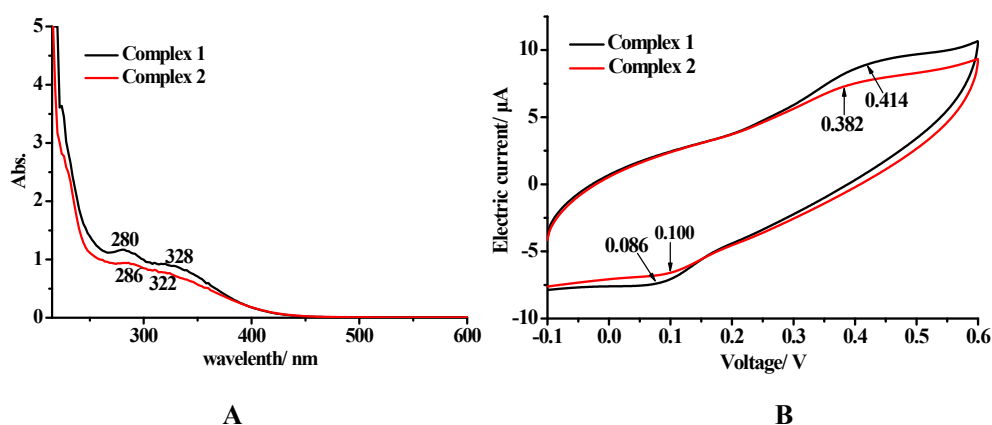

**Figure S4.** (A) The UV-vis spectra (A) and the CV-curve (B) of the complex1 and complex2

The UV-vis spectra test of complex1 and complex2 was carried in water with  $10^{-4}$ mM, PH=7, scanning range from 600 to 200nm. (B) The electrochemical properties of complexes 1and 2 were studied by cyclic voltammetry (CV) at a glassy carbon electrode (GCE) under an envelope of purified nitrogen in PBS buffer solution containing 80mmM complex at 25 °C in the potential range of  $-0.1$  to  $+0.6$  V.

**Table S1. Characteristic IR data ( $\text{cm}^{-1}$ ) of complex 1 and 2**

| Assignment    | Complex 1  | Complex 2 |
|---------------|------------|-----------|
| $\nu$ Mo-O    | 841,807,   | 836,807   |
| $\nu$ Mo=O    | 903,872    | 906,873   |
| $\nu$ =CH     | 3061       | 3056      |
| $\nu$ C=C     | 1580, 1451 | 1592,1452 |
| $\nu$ C-O     | 1273, 1253 | 1273,1253 |
| $\nu$ N-H     | 3345       | 3338      |
| $\gamma$ =C-H | 749, 641   | 749,640   |

**Table S2. Crystal data and structure refinement of crystals 1 and 2**

| crystal                                               | 1                                                               | 2                                                               |
|-------------------------------------------------------|-----------------------------------------------------------------|-----------------------------------------------------------------|
| Empirical formula                                     | C <sub>17</sub> H <sub>30</sub> N <sub>5</sub> O <sub>6</sub> W | C <sub>16</sub> H <sub>26</sub> N <sub>4</sub> O <sub>6</sub> W |
| Formula mass                                          | 584.31                                                          | 554.26                                                          |
| Calcd density, Mg/m <sup>3</sup>                      | 1.858                                                           | 1.857                                                           |
| Crystal system                                        | Monoclinic                                                      | Monoclinic                                                      |
| a/Å                                                   | 7.1077(6)                                                       | 16.5081(7)                                                      |
| b/Å                                                   | 30.934(3)                                                       | 23.4259(8)                                                      |
| c/Å                                                   | 9.8061(8)                                                       | 10.2617(3)                                                      |
| α /°                                                  | 90                                                              | 90                                                              |
| β /°                                                  | 102.769(2)                                                      | 92.433(3)                                                       |
| γ /°                                                  | 90                                                              | 90                                                              |
| Vol, Å <sup>3</sup>                                   | 2089.1(3)                                                       | 3964.8(2)                                                       |
| Temperature (K)                                       | 293(2)                                                          | 293(2)                                                          |
| space group                                           | P2(1)/c                                                         | P2(1)/c                                                         |
| Z                                                     | 4                                                               | 8                                                               |
| Radiation type                                        | MoK $\alpha$                                                    | CuK $\alpha$                                                    |
| Absorption coefficient, $\mu$ /mm <sup>-1</sup>       | 11.152                                                          | 11.152                                                          |
| No. of reflections measured                           | 2606                                                            | 5775                                                            |
| No. of independent reflections                        | 2844                                                            | 4900                                                            |
| R <sub>int</sub>                                      | 0.0962                                                          | 0.085                                                           |
| F(000)                                                | 1156                                                            | 2176                                                            |
| Final R1 values (I > 2 $\sigma$ (I))                  | 0.0577                                                          | 0.0840                                                          |
| Final wR(F <sub>2</sub> ) values (I > 2 $\sigma$ (I)) | 0.1067                                                          | 0.1897                                                          |
| Final R1 values (all data)                            | 0.0820                                                          | 0.1131                                                          |
| Final wR(F <sub>2</sub> ) values (all data)           | 0.1171                                                          | 0.2009                                                          |
| Goodness of fit on F <sub>2</sub>                     | 1.087                                                           | 1.178                                                           |
| completeness                                          | 100%                                                            | 99.9%                                                           |
| CCDC NO.                                              | 1028585                                                         | 1028584                                                         |

**Table S3. Selected bond lengths (Å) and angles (deg) for crystal1 and 2**

| Selected Bond Lengths (Å) |         |          | Selected Angles (deg) |          |          |
|---------------------------|---------|----------|-----------------------|----------|----------|
| crystal                   | 1       | 2        | crystal               | 1        | 2        |
| W1-O1                     | 2.11(1) | 1.970(6) | O1-W1-O2              | 76.4(5)  | 75.6(3)  |
| W1-O2                     | 1.99(1) | 2.133(6) | O1-W1-O3              | 86.1(5)  | 89.6(3)  |
| W1-O3                     | 2.01(1) | 2.130(7) | O1-W1-O4              | 85.5(5)  | 158.9(3) |
| W1-O4                     | 2.13(1) | 1.982(6) | O1-W1-O5              | 91.7(5)  | 102.2(3) |
| W1-O5                     | 1.77(1) | 1.740(8) | O1-W1-O6              | 163.8(6) | 90.8(3)  |
| W1-O6                     | 1.74(1) | 1.737(6) | O2-W1-O3              | 158.6(5) | 80.3(3)  |
| O1-C1                     | 1.35(2) | 1.37(1)  | O2-W1-O4              | 90.2(5)  | 86.8(3)  |
| O2-C2                     | 1.36(2) | 1.31(1)  | O2-W1-O5              | 104.9(5) | 91.3(3)  |
| N4(1)-C28(13)             | 1.35(3) | 1.50(1)  | O2-W1-O6              | 89.1(6)  | 162.2(3) |
| N8(5)-C32(17)             | 1.52(3) | 1.43(1)  | O3-W1-O5              | 87.6(5)  | 163.4(3) |
| C1-C2                     | 1.41(3) | 1.42(2)  | O3-W1-O6              | 106.3(6) | 88.3(3)  |
| C1-C6                     | 1.38(3) | 1.37(2)  | O4-W1-O5              | 163.7(5) | 89.4(3)  |
| C3-C4                     | 1.38(3) | 1.41(2)  | O4-W1-O6              | 87.4(6)  | 103.8(3) |
| C25(13)-C26(14)           | 1.54(3) | 1.47(1)  | O5-W1-O6              | 98.9(6)  | 103.0(3) |
| C27(15)-C28(16)           | 1.49(4) | 1.51(1)  | W1-O1-C1              | 115(1)   | 120.0(6) |
| N1-H1A                    | 0.89    | 0.889    | W1-O2-C2              | 119(1)   | 115.3(6) |
| C3-H3                     | 0.93    | 0.93     | W1-O3-C7              | 118(1)   | 114.3(6) |
| C26(13)-H26(13)A          | 0.97    | 0.97     | W1-O4-C8              | 115(1)   | 119.4(6) |

**Table S4 Selected hydrogen bond lengths (Å) and angles (deg) for crystal1 and 2**

| Complex  | N-H...O      | Å    | N...O    | Å         | <N-H...O      | deg   |
|----------|--------------|------|----------|-----------|---------------|-------|
| <b>1</b> | N1-H1A...O5  | 1.86 | N1...O5  | 2.741(11) | <N1-H1A...O5  | 169.2 |
|          | N1-H1B...O2  | 2.41 | N1...O2  | 3.291(12) | <N1-H1B...O2  | 169.1 |
|          | N3-H3B...O6  | 2.06 | N3...O6  | 2.915(12) | <N3-H3B...O6  | 159.6 |
|          | N4-H4A...O5  | 2.48 | N4...O5  | 3.312(13) | <N4-H4A...O5  | 155.9 |
|          | N4-H4B...O1  | 2.39 | N4...O1  | 3.089(12) | <N4-H4B...O1  | 135.7 |
| <b>2</b> | N8-H8B...O4  | 2.02 | N8...O4  | 2.85(4)   | <N8-H8B...O4  | 154.6 |
|          | N8-H8A...O10 | 2.17 | N8...O10 | 3.01(3)   | <N8-H8A...O10 | 156.1 |
|          | N7-H7B...O1  | 2.30 | N7...O1  | 2.97(4)   | <N7-H7B...O1  | 131.8 |
|          | N6-H6B...O3  | 2.13 | N6...O3  | 3.00(3)   | <N6-H6B...O3  | 167.0 |
|          | N6-H6A...O9  | 2.00 | N6...O9  | 2.87(3)   | <N6-H6A...O9  | 164.8 |
|          | N5-H5B...O7  | 2.20 | N5...O7  | 2.96(4)   | <N5-H5B...O7  | 143.6 |
|          | N4-H4B...O2  | 2.25 | N4...O2  | 3.05(4)   | <N4-H4B...O2  | 149.5 |
|          | N3-H3B...O5  | 2.05 | N3...O5  | 2.83(3)   | <N3-H3B...O5  | 145.3 |
|          | N3-H3A...O11 | 1.85 | N3...O11 | 2.72(4)   | <N3-H3A...O11 | 165.4 |
|          | N2-H2B...O8  | 2.12 | N2...O8  | 2.98(4)   | <N2-H2B...O8  | 161.6 |
|          | N1-H1B...O6  | 2.21 | N1...O6  | 2.80(4)   | <N1-H1B...O6  | 123.3 |
|          | N1-H1A...O12 | 1.94 | N1...O12 | 2.81(4)   | <N1-H1A...O12 | 164.3 |
